# Supplementary material
Source: Elsevier journal article supplement (https://www.sciencedirect.com/science/article/pii/S0213911114000065)
Supplement: mmc1 [file S0213911114000065:mmc1.doc]

**Apéndice A**

**Códigos diagnósticos y de procedimientos CIE9-MC**

*Códigos considerados cirugía conservadora:*

Como diagnóstico primario:

174.0-174.9: Malignant neoplasm of female o 233.0 Carcinoma in situ of breast

Como procedimientos:

85.20 Excision or destruction of breast tissue, not otherwise specified

Excludes: laser interstitial thermal therapy of lesion or tissue of breast under guidance (17.69)

85.21 Local excision of lesion of breast

Lumpectomy

Removal of area of fibrosis from breast

Excludes: biopsy of breast (85.11-85.12)

85.22 Resection of quadrant of breast

85.23 Subtotal mastectomy

Excludes: quadrant resection (85.22)

*Códigos considerados cirugía no conservadora:*

Como diagnóstico primario:

174.0-174.9: Malignant neoplasm of female o 233.0 Carcinoma in situ of breast

Como procedimientos:

85.33 Unilateral subcutaneous mammectomy with synchronous implant

Excludes: that without synchronous implant (85.34)

85.34 Other unilateral subcutaneous mammectomy

Removal of breast tissue with preservation of skin and nipple

Subcutaneous mammectomy NOS

85.35 Bilateral subcutaneous mammectomy with synchronous implant

Excludes: that without synchronous implant (85.36)

85.36 Other bilateral subcutaneous mammectomy

85.41 Unilateral simple mastectomy

85.42 Bilateral simple mastectomy; Bilateral complete mastectomy

85.43 Unilateral extended simple mastectomy

Extended simple mastectomy NOS

Modified radical mastectomy

Simple mastectomy with excision of regional lymph nodes

85.44 Bilateral extended simple mastectomy

85.45 Unilateral radical mastectomy

Excision of breast, pectoral muscles, and regional lymph nodes [axillary, clavicular, supraclavicular]

Radical mastectomy NOS

85.46 Bilateral radical mastectomy

85.47 Unilateral extended radical mastectomy

Excision of breast, muscles, and lymph nodes [axillary, clavicular, supraclavicular, internal mammary, and mediastinal]

Extended radical mastectomy NOS

85.48 Bilateral extended radical mastectomy

**Apéndice B**

**Grupo Atlas VPM**

*Andalucía:*Díaz Martínez A (Hospital Virgen del Rocío, Sevilla), Goicoechea Salazar JA (Servicio Andaluz de Salud), Bermúdez Tamayo C (Escuela Andaluza de Salud Pública, Granada), Fornieles Y (Escuela Andaluza de Salud Pública, Granada), Rivas F (Hospital Costa del Sol, Marbella, Consejería de Salud), Jiménez Puente A (Hospital Costa del Sol, Marbella, Consejería de Salud), Rodríguez del Águila MM (Hospital Virgen de las Nieves, Granada), Molina T (Agencia de Evaluación de Tecnologías Sanitarias de Andalucía) y Baños E (Agencia de Evaluación de Tecnologías Sanitarias de Andalucía); *Aragón:*Bernal Delgado E (Instituto Aragonés de Ciencias de la Salud-Instituto de Investigación Sanitaria de Aragón), Abadía Taira MB (Instituto Aragonés de Ciencias de la Salud-Instituto de Investigación Sanitaria de Aragón), García Armesto S (Instituto Aragonés de Ciencias de la Salud-Instituto de Investigación Sanitaria de Aragón), Launa R (Instituto Aragonés de Ciencias de la Salud-Instituto de Investigación Sanitaria de Aragón), Librero J (Instituto Aragonés de Ciencias de la Salud-Instituto de Investigación Sanitaria de Aragón), Martínez Lizaga N (Instituto Aragonés de Ciencias de la Salud-Instituto de Investigación Sanitaria de Aragón), Ridao M (Instituto Aragonés de Ciencias de la Salud-Instituto de Investigación Sanitaria de Aragón), Seral Rodríguez M (Instituto Aragonés de Ciencias de la Salud-Instituto de Investigación Sanitaria de Aragón), Comendeiro Maaløe M (Instituto Aragonés de Ciencias de la Salud-Instituto de Investigación Sanitaria de Aragón), Angulo E (Instituto Aragonés de Ciencias de la Salud-Instituto de Investigación Sanitaria de Aragón), Beltrán Peribáñez J (Departamento de Salud, Gobierno de Aragón), Abad Diez JM (Departamento de Sanidad, Bienestar Social y Familia, Gobierno de Aragón), Arribas Monzón F (Departamento de Sanidad, Bienestar Social y Familia) y Pradas Arnal F (Departamento de Sanidad, Bienestar Social y Familia, Gobierno de Aragón); *Asturias:*Suárez FM (Consejería de Sanidad, Principado de Asturias) y Caicoya M (Consejería de Sanidad, Principado de Asturias); *Canarias:*Fiuza Pérez D (Servicio Canario de la Salud), Alonso Bilbao JL (Servicio Canario de la Salud), Sánchez Janáriz H (Servicio Canario de la Salud) y Domínguez Trujillo C (Universidad de Las Palmas de Gran Canaria); *Cantabria:*Romero G (Consejería de Sanidad); *Cataluña:*Tebe C (Agència d'Informació, Avaluació i Qualitat en Salut), Oliva G (Departament de Salut), Ortún Rubio V (Universitat Pompeu Fabra, Barcelona) y Salas T (CatSalut-Servei Catalá de la Salut); *Castilla y León:*Sacristán Salgado A (Dirección General de Desarrollo Sanitario), García Crespo J (Dirección General de Desarrollo Sanitario), Melgosa Arcos A (Dirección General de Planificación, Calidad, Ordenación y Formación) y Sangrador Arenas L (Dirección General de Planificación, Calidad, Ordenación y Formación); *Castilla-La Mancha:*García Sánchez MA (Consejería de Sanidad de Castilla-La Mancha), López Reneo R (Servicio de Salud de Castilla-La Mancha, SESCAM) y Solas O (Servicio de Salud de Castilla-La Mancha, SESCAM); *Galicia:*Atienza Merino G (Conselleria de Sanidade de la Xunta de Galicia), Carballeira Roca C (Conselleria de Sanidade de la Xunta de Galicia), Castro Villares M (Servicio Galego de Saúde) y Queiro T (Conselleria de Sanidade de la Xunta de Galicia); *Extremadura:*Montes Salas G (Escuela de Estudios de Ciencias de la Salud); *Illes Balears:*Castaño Riera EJ (Consejería de Salud, Familia y Bienestar Social), Zaforteza Dezcallar M (Servicio de Salud de las Illes Balears), Santos Terrón MJ (Consejería de Salud, Familia y Bienestar Social), Martín Martín MV (Hospital Son Llàtzer) y Ferrer Riera J (Hospital Son Llàtzer); *La Rioja:*Cestafé A (Consejería de Salud); *Madrid:*Albarracín Serra A (Dirección General de Sistemas de Información Sanitaria, SERMAS) y Bienzobas López C (Dirección General de Sistemas de Información Sanitaria, SERMAS); *Murcia:*Palomar Rodríguez J (Consejería de Sanidad de la Región de Murcia) y Hernando Arizaleta L (Consejería de Sanidad de la Región de Murcia); *Navarra:*Álvarez Arruti N (Departamento de Salud de Navarra-Osasunbidea), Montes García Y (Departamento de Salud de Navarra-Osasunbidea) y Rodrigo Rincón I (Departamento de Salud de Navarra-Osasunbidea); *País Vasco:* Aizpuru F (Grupo de Investigación del País Vasco, Osakidetza-SVS), Errezola M (Departamento de Sanidad del Gobierno Vasco), Ibáñez Beroiz B (Grupo de Investigación Biomédica-Navarra), Latorre García PM (Grupo de Investigación del País Vasco, Osakidetza-SVS), Latorre A (Grupo de Investigación del País Vasco, Osakidetza-SVS), Millan E (Grupo de Investigación del País Vasco, Osakidetza-SVS) y Pérez de Arriba J (Grupo de Investigación del País Vasco, Osakidetza-SVS); *Valencia:*Meneu R (Conselleria de Sanitat, Generalitat Valenciana), Peiró Moreno S (Centro Superior de Investigación en Salud Pública), Calabuig J (Conselleria de Sanitat, Generalitat Valenciana), San Félix G (Centro Superior de Investigación en Salud Pública), Sotoca R (Fundación IISS) y Bauxauli C (Centro Superior de Investigación en Salud Pública).
